# Supplementary material for: HT‐29 and Caco‐2 Reporter Cell Lines for Functional Studies of Nuclear Factor Kappa B Activation
Source: Hindawi journal article supplement (doi:10.1155/2015/860534), 2015-01-01

**Supplementary Figure 1**

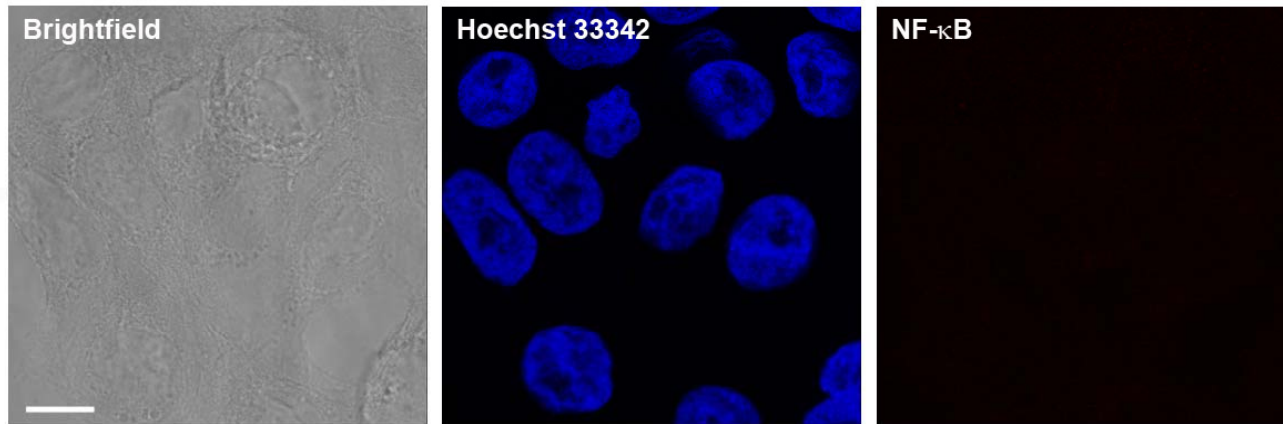

Supplement: f1 [file 860534.f1.pdf]
